# Supplementary material for: Chemically modified small interfering RNA targeting Hedgehog signaling pathway for rheumatoid arthritis therapy
Source: PubMed Central journal article supplement — Mol Ther Nucleic Acids. 2022 Dec 12;31:88–104. doi: 10.1016/j.omtn.2022.12.008 (PMC9813581; doi:10.1016/j.omtn.2022.12.008), 2022-12-12
Supplement: mmc1.pdf [file mmc1.pdf]

**OMTN, Volume 31**

**Supplemental information**

**Chemically modified small interfering  
RNA targeting Hedgehog signaling  
pathway for rheumatoid arthritis therapy**

**Lang Lin, Shangling Zhu, Hongyu Huang, Lin-Ping Wu, and Jianlin Huang**

**Table S1. The sequences of naked siRNA targeting SMO mRNA.**

| siRNA    | Strand | Sequence (5'-3')         |
|----------|--------|--------------------------|
| si-h-1   | S      | CUACGUCAAUGCGUGCUUCdTdT  |
|          | AS     | GAAGCACGCAUUGACGUAGdTdT  |
| si-h-2   | S      | CGUCA AUGCGUGCUUCUUUdTdT |
|          | AS     | AAAGAAGCACGCAUUGACGdTdT  |
| si-h-3   | S      | CGAGGAGUCAUGACUCUGUdTdT  |
|          | AS     | ACAGAGUCAUGACUCCUCGdTdT  |
| si-h-4   | S      | UGACUCUGUUCUCAUCAAdTdT   |
|          | AS     | UUGAUGGAGAACAGAGUCAAdTdT |
| si-h-5   | S      | UCUUUGUCAUCGUGUACUAdTdT  |
|          | AS     | UAGUACACGAUGACAAAGAdTdT  |
| si-h-6   | S      | UGCCCAAGUGUGAGAAUGAdTdT  |
|          | AS     | UCAUUCUCACACUUGGGCAdTdT  |
| si-h-7   | S      | UCGCUACCCUGCUGUUUUdTdT   |
|          | AS     | AAUAACAGCAGGGUAGCGAdTdT  |
| si-h-8   | S      | GCCACUUCUACGACUUCUUdTdT  |
|          | AS     | AAGAAGUCGUAGAAGUGGCdTdT  |
| si-h/m-1 | S      | CAUGCCCAAGUGUGAGAAUdTdT  |
|          | AS     | AUUCUCACACUUGGGCAUGdTdT  |
| si-h/m-2 | S      | AGGACAUGCACAGCUACAAdTdT  |
|          | AS     | AUGUAGCUGUGCAUGUCCUdTdT  |
| si-h/m-3 | S      | UGGGAGGCUACUCCUCAUdTdT   |
|          | AS     | AUGAGGAAGUAGCCUCCAdTdT   |
| si-h/m-4 | S      | GCCUGGGCAUUUUUGGCUUdTdT  |
|          | AS     | AAGCCAAAAAUGCCCAGGCdTdT  |
| si-NC    | S      | UUCUCCGAACGUGUCACGUdTdT  |
|          | AS     | ACGUGACACGUUCGGAGAAAdTdT |

Abbreviations: siRNA, small interfering RNA; SMO, Smoothened; mRNA, messenger RNA; NC, negative control; S, sense strand; AS, antisense strand; A, adenine; U, uracil; G, guanine; C, cytosine; dT, deoxy thymine.

**Table S2. The sequences of chemically modified siRNA.**

| siRNA   | Strand | Sequence (5'-3')                                |
|---------|--------|-------------------------------------------------|
| si-S1A1 | S      | mAmGmGACAUGCACAGCUAmCmAmUdTdT                   |
|         | AS     | phos-mAmUmGUAGCUGUGCAUGUmCmCmUdTdT              |
| si-S1A2 | S      | mAmGmGACAUGCACAGCUAmCmAmUdTdT                   |
|         | AS     | phos-mAmUmGUAGCUmGfUmGCAUGUmCmCmUdTdT           |
| si-S1A3 | S      | mAmGmGACAUGCACAGCUAmCmAmUdTdT                   |
|         | AS     | phos-mAmUmGUAmGfCfUmGfUmGCmAUmGUmCmCmUdTdT      |
| si-S1A4 | S      | mAmGmGACAUGCACAGCUAmCmAmUdTdT                   |
|         | AS     | phos-mAmUmGfUmAmGfCfUmGfUmGfCmAfUmGfUmCmCmUdTdT |
| si-S2A1 | S      | mAmGmGACAUGfCmAfCAGCUAmCmAmUdTdT                |
|         | AS     | phos-mAmUmGUAGCUGUGCAUGUmCmCmUdTdT              |
| si-S2A2 | S      | mAmGmGACAUGfCmAfCAGCUAmCmAmUdTdT                |
|         | AS     | phos-mAmUmGUAGCUmGfUmGCAUGUmCmCmUdTdT           |
| si-S2A3 | S      | mAmGmGACAUGfCmAfCAGCUAmCmAmUdTdT                |
|         | AS     | phos-mAmUmGUAmGfCfUmGfUmGCmAUmGUmCmCmUdTdT      |
| si-S2A4 | S      | mAmGmGACAUGfCmAfCAGCUAmCmAmUdTdT                |
|         | AS     | phos-mAmUmGfUmAmGfCfUmGfUmGfCmAfUmGfUmCmCmUdTdT |
| si-S3A1 | S      | mAmGmGAfCAfUGfCmAfCmAmGfCUAmCmAmUdTdT           |
|         | AS     | phos-mAmUmGUAGCUGUGCAUGUmCmCmUdTdT              |
| si-S3A2 | S      | mAmGmGAfCAfUGfCmAfCmAmGfCUAmCmAmUdTdT           |
|         | AS     | phos-mAmUmGUAGCUmGfUmGCAUGUmCmCmUdTdT           |
| si-S3A3 | S      | mAmGmGAfCAfUGfCmAfCmAmGfCUAmCmAmUdTdT           |
|         | AS     | phos-mAmUmGUAmGfCfUmGfUmGCmAUmGUmCmCmUdTdT      |
| si-S3A4 | S      | mAmGmGAfCAfUGfCmAfCmAmGfCUAmCmAmUdTdT           |
|         | AS     | phos-mAmUmGfUmAmGfCfUmGfUmGfCmAfUmGfUmCmCmUdTdT |
| si-S4A1 | S      | mAmGmGmAfCmAfUmGfCmAfCmAmGfCfUmAmCmAmUdTdT      |
|         | AS     | phos-mAmUmGUAGCUGUGCAUGUmCmCmUdTdT              |
| si-S4A2 | S      | mAmGmGmAfCmAfUmGfCmAfCmAmGfCfUmAmCmAmUdTdT      |
|         | AS     | phos-mAmUmGUAGCUmGfUmGCAUGUmCmCmUdTdT           |
| si-S4A3 | S      | mAmGmGmAfCmAfUmGfCmAfCmAmGfCfUmAmCmAmUdTdT      |
|         | AS     | phos-mAmUmGUAmGfCfUmGfUmGCmAUmGUmCmCmUdTdT      |
| si-S4A4 | S      | mAmGmGmAfCmAfUmGfCmAfCmAmGfCfUmAmCmAmUdTdT      |
|         | AS     | phos-mAmUmGfUmAmGfCfUmGfUmGfCmAfUmGfUmCmCmUdTdT |

Abbreviations: siRNA, small interfering RNA; S, sense strand; AS, antisense strand; A, adenine; U, uracil; G, guanine; C, cytosine; dT, deoxy thymine; m, 2'-O-methyl; f, 2'-Fluoro; phos-, 5'-Phosphate.

**Table S3. The sequences of chemically modified siRNA conjugated with cholesterol.**

| siRNA        | Strand | Sequence (5'-3')                                |
|--------------|--------|-------------------------------------------------|
| si-S1A3-Chol | S      | mAmGmGACAUGCACAGCUAmCmAmUdTdT-Chol              |
|              | AS     | phos-mAmUmGUAmGfCfUmGfUmGCmAUmGUmCmCmUdTdT      |
| si-S1A4-Chol | S      | mAmGmGACAUGCACAGCUAmCmAmUdTdT-Chol              |
|              | AS     | phos-mAmUmGfUmAmGfCfUmGfUmGfCmAfUmGfUmCmCmUdTdT |
| si-Scr-Chol  | S      | mUmAmCAUCGACACGUACAmGmGmAdTdT-Chol              |
|              | AS     | phos-mUmCmCUGmUfAfCmGfUmGUmCGmAUmGmUmAdTdT      |

Abbreviations: siRNA, small interfering RNA; S, sense strand; AS, antisense strand; Scr, scrambled siRNA; A, adenine; U, uracil; G, guanine; C, cytosine; dT, deoxy thymine; m, 2'-O-methyl; f, 2'-Fluoro; phos-, 5'-Phosphate; -Chol, 3'-Cholesterol.

**Table S4. The expression of top 100 similar transcripts.**

| Number | Gene symbol     | Accession      | No. of matches | log <sub>2</sub> FoldChange | P value     | adjusted P value |
|--------|-----------------|----------------|----------------|-----------------------------|-------------|------------------|
| 1      | <b>SMO</b>      | NM_005631.5    | 19             | -1.581578228                | 4.71E-28    | 4.32E-26         |
| 2      | <i>GRIN2D</i>   | NM_000836.4    | 17             | -0.337664881                | 0.364320202 | 0.565037153      |
| 3      | <i>GRIA2</i>    | NM_001083619.3 | 15             | 1.653186782                 | 0.547566006 | 1                |
| 4      | <i>UGGT1</i>    | NM_020120.4    | 14             | -0.081736214                | 0.248417371 | 0.437435049      |
| 5      | <i>WDFY4</i>    | NM_001394531.1 | 14             | -0.527920958                | 0.77526486  | 1                |
| 6      | <b>UBE2G1</b>   | NM_003342.5    | 14             | -1.233954249                | 1.68E-30    | 1.8E-28          |
| 7      | <i>PCLO</i>     | NM_033026.6    | 13             | 1.596328256                 | 0.596458807 | 1                |
| 8      | <i>MOB3B</i>    | NM_024761.5    | 13             | -2.031495538                | 0.245266661 | 1                |
| 9      | <i>NDUFAF6</i>  | NM_152416.4    | 13             | 0.19535221                  | 0.281633821 | 0.476792989      |
| 10     | <i>NUDT21</i>   | NM_007006.3    | 13             | -0.362331723                | 0.000740126 | 0.004156914      |
| 11     | <i>HUWE1</i>    | NM_031407.7    | 13             | 0.029165164                 | 0.733056968 | 0.856240949      |
| 12     | <i>PIGS</i>     | NM_033198.4    | 13             | -0.313745649                | 0.000243344 | 0.001556904      |
| 13     | <i>PLEKHA2</i>  | NM_021623.2    | 13             | 0.539724833                 | 0.0000238   | 0.00019514       |
| 14     | <i>GRK6</i>     | NM_001004106.3 | 13             | 0.057073887                 | 0.629127014 | 0.787626826      |
| 15     | <i>TMEM266</i>  | NM_152335.3    | 13             | -0.478179458                | 0.33263856  | 0.533079197      |
| 16     | <i>FBXO36</i>   | NM_174899.5    | 13             | -0.019803818                | 0.940999004 | 0.970361153      |
| 17     | <i>OTUD7A</i>   | NM_001382637.1 | 13             | 0.249975011                 | 0.813253682 | 1                |
| 18     | <i>RFFL</i>     | NM_001017368.2 | 13             | 0.423830891                 | 0.00588671  | 0.024457785      |
| 19     | <i>SLC26A5</i>  | NM_198999.3    | 13             | ND                          | ND          | ND               |
| 20     | <i>KBTBD7</i>   | NM_032138.7    | 13             | -0.914605949                | 0.0000134   | 0.000116335      |
| 21     | <i>ENTPD6</i>   | NM_001247.5    | 13             | -0.03950115                 | 0.650585546 | 0.802077041      |
| 22     | <i>INKA1</i>    | NM_203370.2    | 13             | 0.119451686                 | 0.621958318 | 0.782696773      |
| 23     | <i>TRIB3</i>    | NM_021158.5    | 13             | -0.139729939                | 0.053455602 | 0.145699231      |
| 24     | <i>PAX1</i>     | NM_001257096.2 | 13             | -1.854264571                | 0.086947923 | 1                |
| 25     | <i>ACTR5</i>    | NM_024855.4    | 12             | 0.020331516                 | 0.835582489 | 0.918039459      |
| 26     | <i>SHISAL2A</i> | NM_001042693.3 | 12             | ND                          | ND          | ND               |
| 27     | <i>TPD52L1</i>  | NM_003287.4    | 12             | -0.196756897                | 0.02424368  | 0.078446261      |
| 28     | <i>EDEM1</i>    | NM_014674.3    | 12             | 0.280014938                 | 0.001119633 | 0.005955408      |
| 29     | <i>CD276</i>    | NM_001024736.2 | 12             | -0.124490963                | 0.041773671 | 0.120181868      |
| 30     | <i>SHISAL2B</i> | NM_001164442.2 | 12             | 2.641930609                 | 0.407897946 | 1                |
| 31     | <i>BMP1</i>     | NM_006129.5    | 12             | 0.031500623                 | 0.686169287 | 0.825591286      |
| 32     | <b>PLXNC1</b>   | NM_005761.3    | 12             | -1.456652731                | 0.000808984 | 0.004487005      |
| 33     | <i>COMMD8</i>   | NM_017845.5    | 12             | 0.192966542                 | 0.15346262  | 0.315554339      |
| 34     | <i>HERC1</i>    | NM_003922.4    | 12             | 0.163195221                 | 0.124550761 | 0.271919425      |
| 35     | <i>TMEM9B</i>   | NM_020644.3    | 12             | -0.349271642                | 0.000203291 | 0.00133031       |
| 36     | <i>NPAS2</i>    | NM_002518.4    | 12             | -0.549699535                | 0.00000422  | 0.0000404        |
| 37     | <i>STK32C</i>   | NM_173575.4    | 12             | -0.042943503                | 0.781519114 | 0.886442541      |
| 38     | <i>SPAG9</i>    | NM_001130528.3 | 12             | 0.341465239                 | 0.0000131   | 0.000113954      |
| 39     | <i>CCDC71</i>   | NM_022903.4    | 12             | -0.169468693                | 0.193680428 | 0.370808673      |
| 40     | <b>CCN4</b>     | NM_003882.4    | 12             | -1.172069865                | 6.08E-35    | 8.89E-33         |
| 41     | <i>NUDT3</i>    | NM_006703.4    | 12             | 0.209764731                 | 0.224923759 | 0.409201619      |
| 42     | <i>PAPPA</i>    | NM_002581.5    | 12             | -0.158702353                | 0.236588574 | 0.423808563      |
| 43     | <i>CNOT1</i>    | NM_016284.5    | 12             | 0.008390124                 | 0.928283521 | 0.963946975      |
| 44     | <i>PLB1</i>     | NM_153021.5    | 12             | -0.054391022                | 0.911084019 | 0.956673486      |
| 45     | <i>IKZF3</i>    | NM_012481.5    | 12             | ND                          | ND          | ND               |
| 46     | <i>KDM4D</i>    | NM_018039.3    | 12             | -0.131656502                | 0.845587886 | 1                |
| 47     | <i>TRIOBP</i>   | NM_001039141.3 | 12             | 0.70236634                  | 8.82E-28    | 7.96E-26         |
| 48     | <i>CAPN2</i>    | NM_001748.5    | 12             | 0.582651226                 | 1.79E-24    | 1.17E-22         |
| 49     | <i>CATSPERD</i> | NM_152784.4    | 12             | 1.976982283                 | 0.447152159 | 1                |
| 50     | <i>PPP1R12A</i> | NM_002480.3    | 12             | -0.292016359                | 0.001065143 | 0.00570012       |

|     |                 |                |    |              |             |             |
|-----|-----------------|----------------|----|--------------|-------------|-------------|
| 51  | <i>TOMM22</i>   | NM_020243.5    | 12 | 0.595599724  | 0.00000117  | 0.0000125   |
| 52  | <i>RHBDD1</i>   | NM_001167608.3 | 12 | -0.044719417 | 0.679061475 | 0.820774924 |
| 53  | <i>SLC25A39</i> | NM_001143780.3 | 12 | 0.023570839  | 0.801141988 | 0.898724696 |
| 54  | <i>VAR51</i>    | NM_006295.3    | 12 | ND           | ND          | ND          |
| 55  | <i>RPUSD4</i>   | NM_032795.3    | 12 | -0.22326424  | 0.08380885  | 0.203321632 |
| 56  | <i>DUSP3</i>    | NM_004090.4    | 12 | 0.32148802   | 0.000834723 | 0.004614324 |
| 57  | <i>PTPRF</i>    | NM_002840.5    | 12 | 0.381352771  | 0.0000215   | 0.000177797 |
| 58  | <i>SORCS3</i>   | NM_014978.3    | 12 | ND           | ND          | ND          |
| 59  | <i>XPNPEP3</i>  | NM_022098.4    | 12 | -0.962206924 | 9.51E-12    | 2.17E-10    |
| 60  | <i>UTP25</i>    | NM_014388.7    | 12 | 0.182366767  | 0.102135193 | 0.235260099 |
| 61  | <i>SPIRE2</i>   | NM_032451.2    | 12 | -0.079166663 | 0.713131575 | 0.84390253  |
| 62  | <i>FRMD1</i>    | NM_024919.6    | 12 | ND           | ND          | ND          |
| 63  | <i>UBR2</i>     | NM_001363705.2 | 12 | 0.280956048  | 0.003939603 | 0.017561661 |
| 64  | <i>FLNB</i>     | NM_001457.4    | 12 | 0.443591128  | 0.00000017  | 0.00000209  |
| 65  | <i>SORCS2</i>   | NM_020777.3    | 12 | -0.124300743 | 0.292467351 | 0.489429479 |
| 66  | <i>SIKE1</i>    | NM_025073.3    | 12 | 0.051177396  | 0.602546478 | 0.767784905 |
| 67  | <i>FAM227A</i>  | NM_001013647.2 | 12 | -0.527534496 | 0.083663697 | 0.20313464  |
| 68  | <i>BICC1</i>    | NM_001080512.3 | 12 | -0.640274508 | 1.13E-17    | 4.54E-16    |
| 69  | <i>CDH22</i>    | NM_021248.3    | 12 | ND           | ND          | ND          |
| 70  | <i>CTRC</i>     | NM_007272.3    | 12 | 1.967429765  | 0.287436342 | 1           |
| 71  | <i>RTTN</i>     | NM_173630.4    | 12 | -0.424187768 | 0.007033916 | 0.028325512 |
| 72  | <i>FLRT2</i>    | NM_013231.6    | 12 | -0.098259767 | 0.228004107 | 0.413193401 |
| 73  | <i>PIK3C2A</i>  | NM_002645.4    | 12 | -0.608827163 | 0.000000118 | 0.00000149  |
| 74  | <i>TRAPPC2L</i> | NM_001318525.2 | 12 | -0.148992416 | 0.222500379 | 0.406477978 |
| 75  | <i>CYP11B1</i>  | NM_000497.4    | 12 | ND           | ND          | ND          |
| 76  | <i>RHOXF2</i>   | NM_032498.3    | 12 | -1.743646521 | 0.665729628 | 1           |
| 77  | <i>ZBTB11</i>   | NM_014415.4    | 12 | -0.144786188 | 0.218312934 | 0.400791064 |
| 78  | <i>UBE2L5</i>   | NM_001355247.2 | 12 | -0.723496779 | 0.819994774 | 1           |
| 79  | <i>ACTR5</i>    | NM_005735.4    | 12 | 0.13426405   | 0.567321992 | 0.739704983 |
| 80  | <i>SF3B1</i>    | NM_012433.4    | 12 | -0.08260555  | 0.227841535 | 0.413099489 |
| 81  | <b>HELLS</b>    | NM_018063.5    | 12 | -1.722568363 | 1.52E-16    | 5.53E-15    |
| 82  | <i>PIK3C2G</i>  | NM_001288772.2 | 12 | ND           | ND          | ND          |
| 83  | <i>RAX2</i>     | NM_001319074.4 | 12 | ND           | ND          | ND          |
| 84  | <i>SERPINA9</i> | NM_175739.4    | 12 | 1.17786226   | 0.443888454 | 1           |
| 85  | <i>MMAA</i>     | NM_172250.3    | 12 | -0.190040075 | 0.263013942 | 0.454478907 |
| 86  | <i>CASP10</i>   | NM_032977.4    | 12 | -0.213849221 | 0.693835672 | 0.83052456  |
| 87  | <i>SH3TC2</i>   | NM_024577.4    | 12 | 0.40258154   | 0.335383452 | 0.536038683 |
| 88  | <i>CCND1</i>    | NM_053056.3    | 12 | 0.750302999  | 4.89E-35    | 7.22E-33    |
| 89  | <i>TENM1</i>    | NM_001163278.2 | 12 | 1.985323203  | 0.447382052 | 1           |
| 90  | <i>TTN</i>      | NM_001267550.2 | 12 | 0.566895677  | 0.002445276 | 0.011678462 |
| 91  | <i>TDRD1</i>    | NM_001395205.1 | 12 | 2.150231711  | 0.589919457 | 1           |
| 92  | <i>MACF1</i>    | NM_001394062.1 | 12 | 0.154639839  | 0.080470033 | 0.196983247 |
| 93  | <i>NTRK3</i>    | NM_001012338.3 | 12 | -0.052478469 | 0.954039881 | 1           |
| 94  | <i>TNS1</i>     | NM_001387777.1 | 12 | 0.01326558   | 0.882843708 | 0.943690222 |
| 95  | <i>PAIP2B</i>   | NM_020459.1    | 12 | 0.125788922  | 0.853087671 | 1           |
| 96  | <i>COPA</i>     | NM_004371.4    | 11 | 0.158176758  | 0.012685144 | 0.046075281 |
| 97  | <i>MUC6</i>     | NM_005961.3    | 11 | ND           | ND          | ND          |
| 98  | <i>LYPLA2</i>   | NM_007260.3    | 11 | 0.445295574  | 0.0000689   | 0.00050934  |
| 99  | <i>SOX11</i>    | NM_003108.4    | 11 | 0.040000636  | 0.948194183 | 0.974650859 |
| 100 | <i>PHF3</i>     | NM_001370348.2 | 11 | 0.192480682  | 0.075094142 | 0.1875782   |

Abbreviations: No. of matches, the number of matched sequences between si-S1A3-Chol and similar transcripts; FoldChange, the fold change of transcripts' reads between si-S1A3-Chol versus blank control; ND, not detected in RNA-seq data.

**Table S5. Summary of plasma pharmacokinetic parameters for si-S1A3-Chol in rats following single IV or IA administration.**

| Pharmacokinetics parameters | sense strand  |             | antisense strand |             |
|-----------------------------|---------------|-------------|------------------|-------------|
|                             | IV            | IA          | IV               | IA          |
| $C_{max}$ (nmol/L)          | 49.53 ± 25.14 | 2.81 ± 1.13 | 31.83 ± 11.24    | 0.37 ± 0.11 |
| $t_{max}$ (h)               | 0.08 ± 0.00   | 0.28 ± 0.12 | 0.08 ± 0.00      | 0.42 ± 0.08 |
| AUC (nmol/L*h)              | 23.58 ± 5.69  | 3.15 ± 0.62 | 12.67 ± 3.23     | 1.94 ± 0.30 |

Abbreviations: IV, intravenous; IA, intra-articular; SEM, standard error of mean;  $C_{max}$ , the maximum measured concentration;  $t_{max}$ , the time to reach the maximum measured concentration; AUC, area under the concentration-time profile from time zero to the last time point. Data were presented as mean ± SEM.

**Table S6. The primer sequences used for qPCR analysis.**

| Target gene     | Primer  | Sequence (5'-3')         |
|-----------------|---------|--------------------------|
| <i>GAPDH</i>    | Forward | CCCATGGCAAATTCCATGGCACCG |
|                 | Reverse | GTCATGGATGACCTTGGCCAGGGG |
| <i>SMO</i>      | Forward | CATCAAGTTCAACAGTTCAGGC   |
|                 | Reverse | AATAACAGCAGGGTAGCGATTC   |
| <i>Gapdh</i>    | Forward | CATCACTGCCACCCAGAAGACTG  |
|                 | Reverse | ATGCCAGTGAGCTTCCCGTTCAG  |
| <i>Smo</i>      | Forward | GAGGCTACTTCCTCATCAGAGG   |
|                 | Reverse | GCTGAAGGTGATGAGCACAAAGC  |
| si-S1A3-Chol-S  | RT      | miR8006091 (Ribobio)     |
|                 | Forward | miR8006092 (Ribobio)     |
|                 | Reverse | ssD089261711 (Ribobio)   |
| si-S1A3-Chol-AS | RT      | miR8006129 (Ribobio)     |
|                 | Forward | miR8006130 (Ribobio)     |
|                 | Reverse | ssD089261711 (Ribobio)   |

Abbreviations: qPCR, quantitative real-time polymerase chain reaction; GAPDH, glyceraldehyde-3-phosphate dehydrogenase; SMO, Smoothened; siRNA, small interfering RNA; S, sense strand; AS, antisense strand; RT, reverse transcription; A, adenine; T, thymine; G, guanine; C, cytosine.



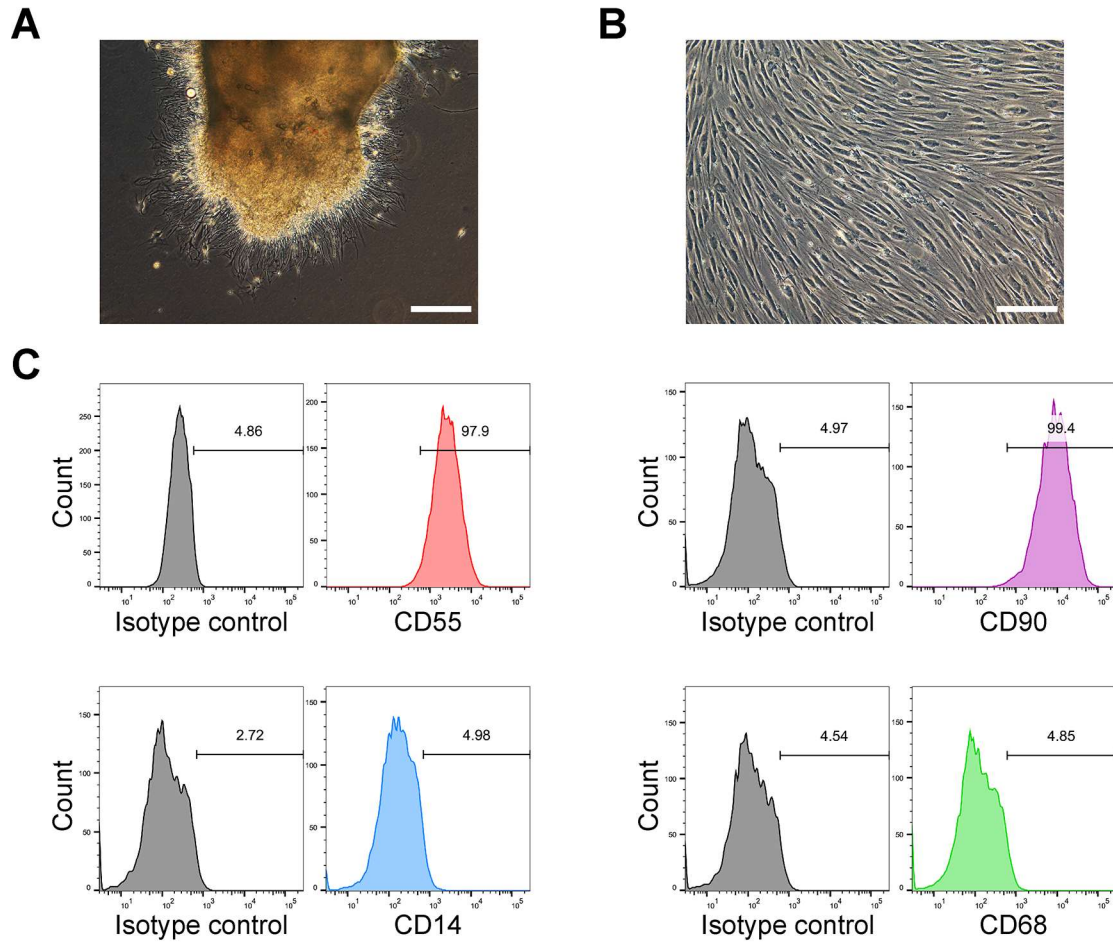

**Figure S1. The morphological characters and surface molecules expression of RA-FLSs.**

**(A)** The primary cell crawled out from synovial tissues within seven days. Scale bar, 200 μm. **(B)** RA-FLSs at passage three were characterised as spindle cell morphology and woven shape under an optical microscope. Scale bar, 200 μm. **(C)** The surface molecules of RA-FLSs at passage three were characterised by flow cytometry. Isotype-matched antibodies were used as methodologic controls, respectively. The high rate of CD55 and CD90, and the negative staining of CD14 and CD68, indicate the high purity of RA-FLSs used in the study.

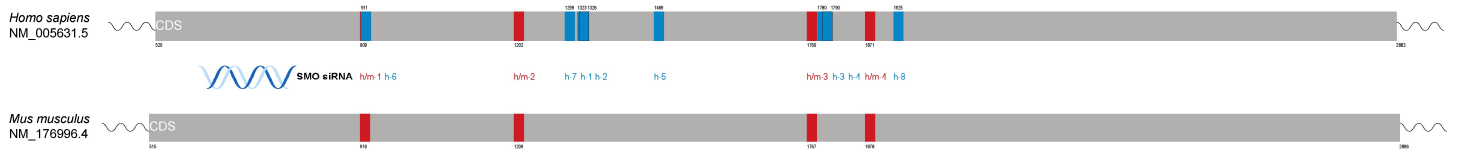

**Figure S2. The target sites of anti-SMO siRNAs.**

The target sites of anti-SMO siRNAs against the SMO mRNA coding sequences in *Homo sapiens* (blue) and *Mus musculus* (red).

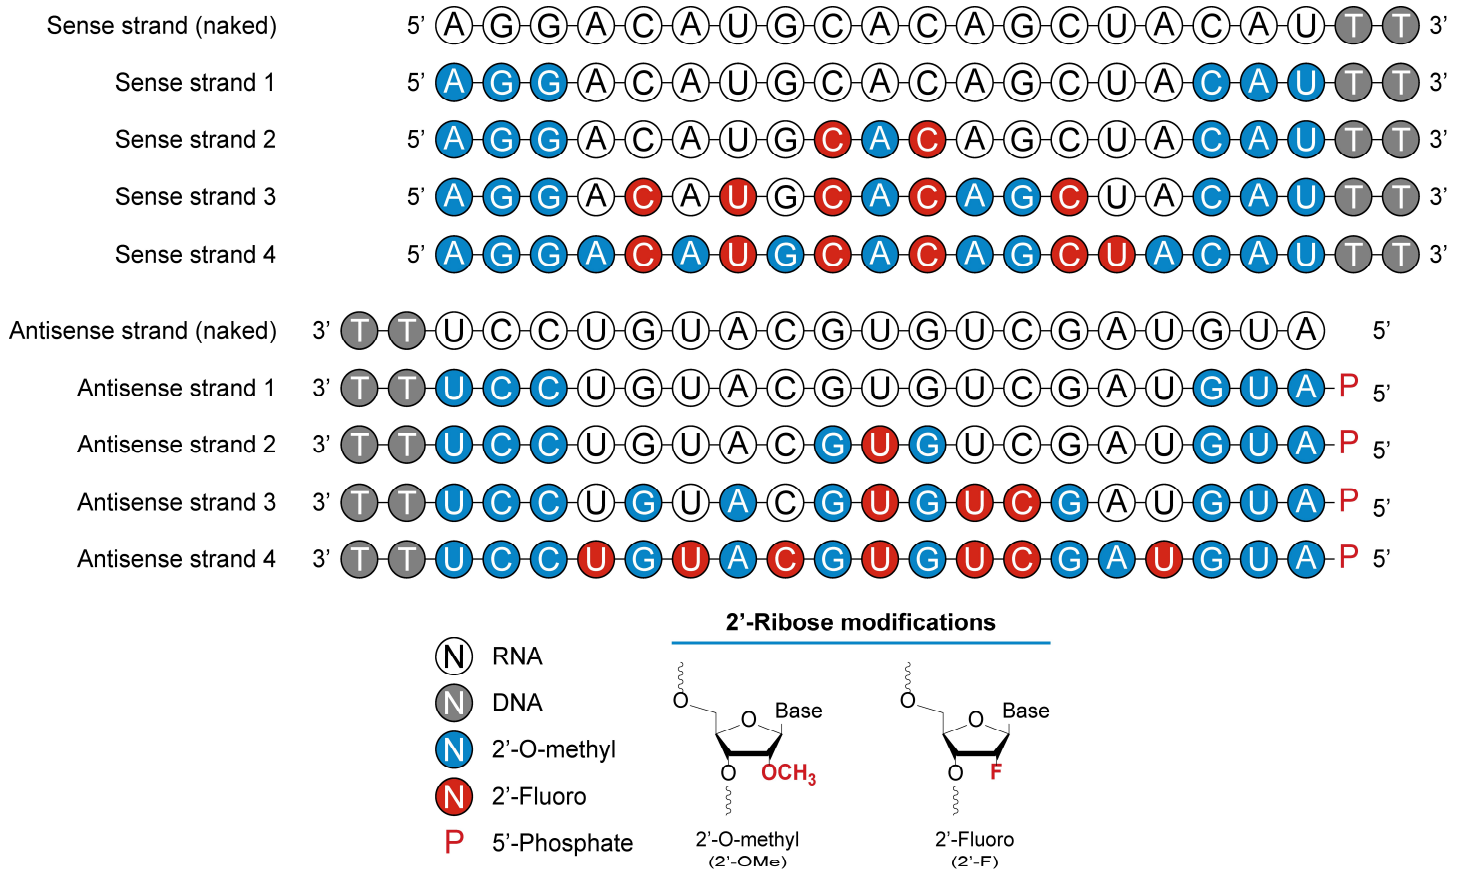

**Figure S3. Chemical modifications patterns of si-h/m-2.**

Chemical modifications including 2'-O-methyl, 2'-fluoro, and 5'-phosphate were introduced to different sites of the sense strand (called sense strand 1 to 4) and antisense strand (called antisense strand 1 to 4) of si-h/m-2. Schematic diagrams of naked siRNA and chemically modified siRNAs were shown.

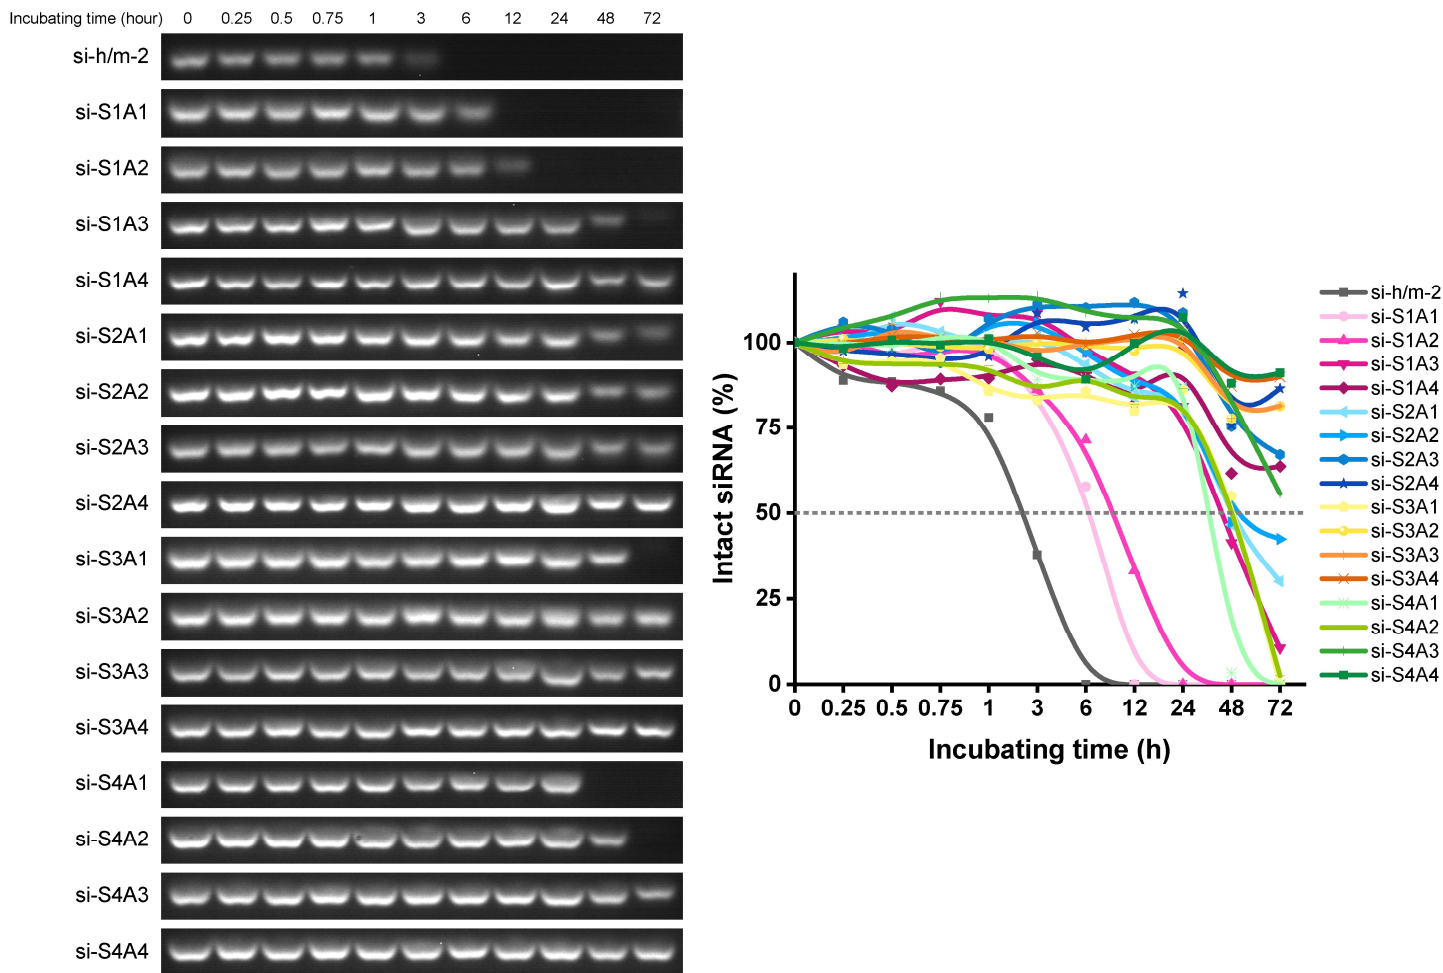

**Figure S4. Chemical modifications enhance the stabilities of siRNA.**

The agarose gel electrophoresis showed the stability of chemically modified siRNA incubated in human serum for the indicated time. The si-h/m-2 (naked siRNA) was used as a control. The percentages of intact siRNA after incubating for the indicated time were shown in the line chart (n = 1).

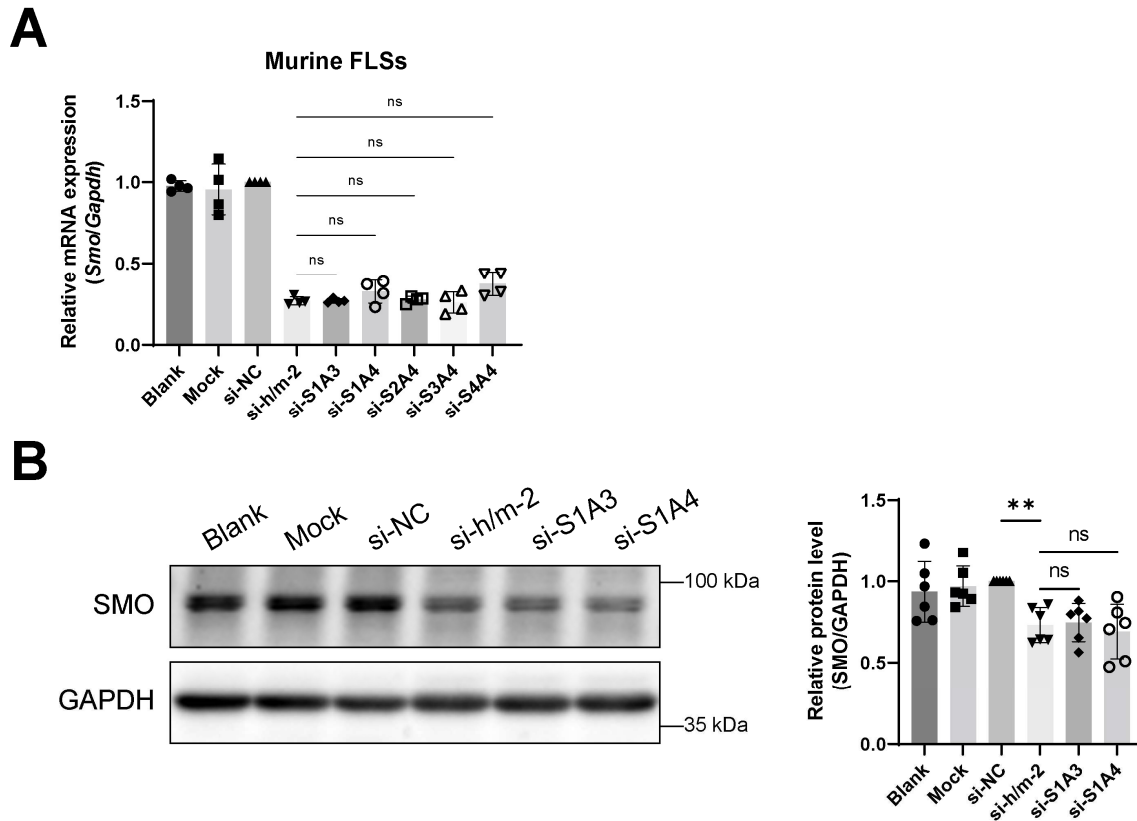

**Figure S5. Chemically modified siRNAs inhibit SMO expression with high efficiency in murine FLSs.**

**(A)** Comparison of silencing efficiency between naked siRNA and chemically modified siRNAs. Relative Smo mRNA expression was quantified by qPCR after murine FLSs were transfected with naked siRNA or chemically modified siRNAs (50 nM) for 48 h and shown as fold change versus si-NC (50 nM) ( $n = 4$ ). **(B)** Representative western blot of SMO protein after murine FLSs were transfected with si-h/m-2, si-S1A3, or si-S1A4 (50 nM) for 72 h. GAPDH was used as a loading control. Relative expression was calculated as the ratio of SMO/GAPDH and presented as fold change versus si-NC (50 nM) ( $n = 6$ ). Statistics: Data were presented as mean  $\pm$  SD; ns  $P > 0.05$ ,  $**P < 0.01$  versus si-NC group by one-way ANOVA with Dunnett's test for multiple comparisons.

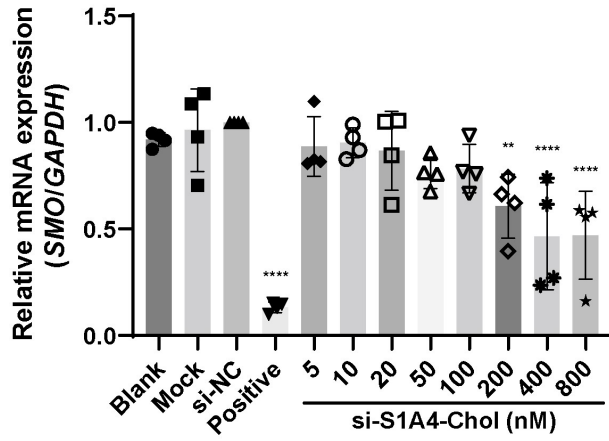

**Figure S6. Cholesterol-conjugated chemically modified siRNAs inhibit SMO mRNA expression without the transfection reagent.**

Concentration dependence of si-S1A4-Chol in the silence of SMO mRNA expression was determined by qPCR after RA-FLSs were transfected with si-S1A4-Chol at indicated concentrations without any transfection reagent for 48 h, si-S1A4 (50 nM) transfected with transfection reagent was served as the positive control, and relative expression was shown as fold change versus si-NC (50 nM) ( $n = 4$ ). Statistics: Data were presented as mean  $\pm$  SD; \*\* $P < 0.01$ , \*\*\*\* $P < 0.0001$  versus si-NC group by one-way ANOVA with Dunnett's test for multiple comparisons.

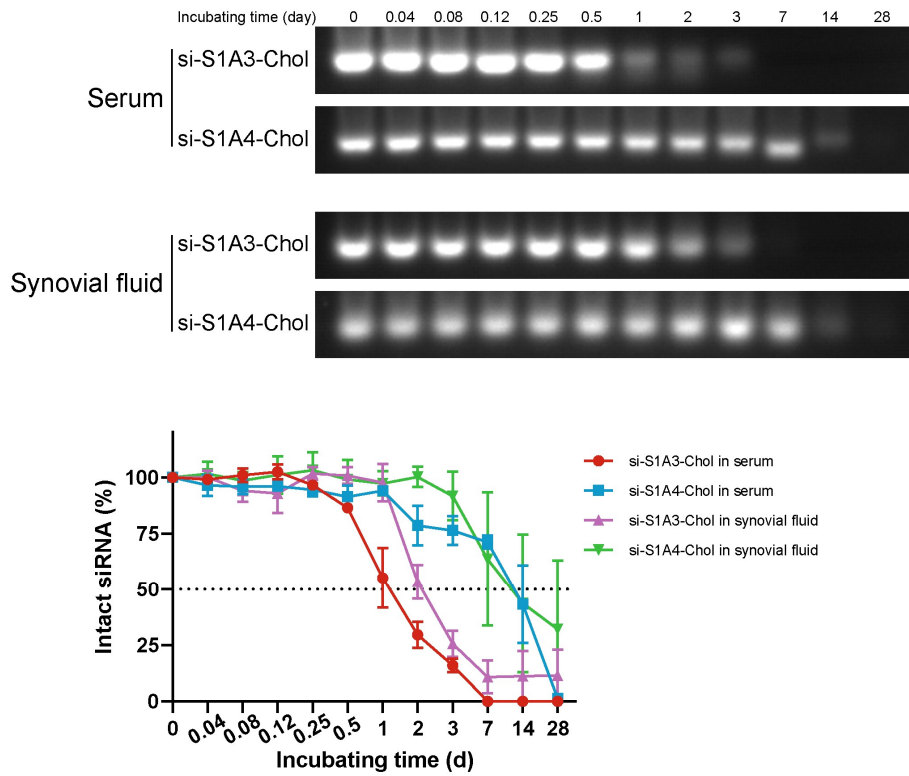

**Figure S7. Chemical modifications enhance the stabilities of siRNA in synovial fluids.**

The representative agarose gel electrophoresis showed the stability of cholesterol-conjugated chemically modified siRNAs incubated in human serum and rheumatoid arthritis synovial fluids for the indicated time. The percentages of intact siRNA after incubating for the indicated time were shown in the line chart (n = 3).

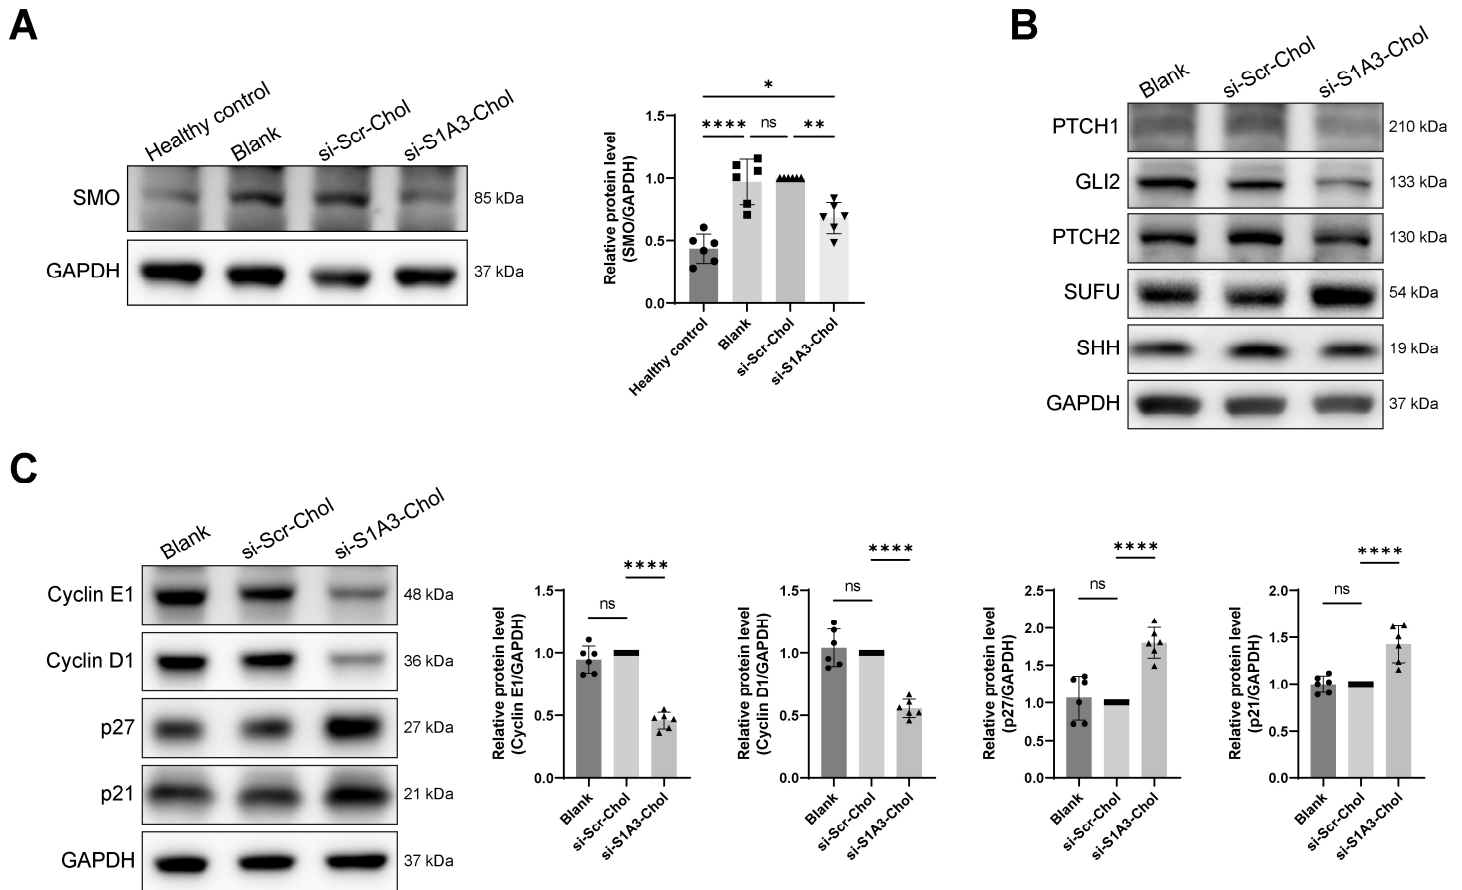

**Figure S8. Chemically modified siRNAs inhibit the activity of Hedgehog signalling pathway in RA-FLSs.**

**(A)** The SMO protein level was over-expressed in RA-FLSs compared with FLSs from healthy control, and was reduced in RA-FLSs treating with si-S1A3-Chol (800 nM) for 72 h. GAPDH was used as a loading control. Relative expression was calculated as the ratio of protein/GAPDH and presented as fold change versus si-Scr-Chol (n = 6). **(B)** The inhibiting effect on hedgehog signalling pathway after si-S1A3-Chol treatment. Representative western blot of proteins in total protein after RA-FLSs were treated with si-Scr-Chol or si-S1A3-Chol (800 nM) for 72 h. GAPDH was used as a loading control. **(C)** The inhibiting effect on cell cycle pathway after si-S1A3-Chol treatment. Representative western blot of proteins in total protein after RA-FLSs were treated with si-Scr-Chol or si-S1A3-Chol (800 nM) for 72 h. GAPDH was used as a loading control. Relative expression was calculated as the ratio of protein/GAPDH and presented as fold change versus si-Scr-Chol (n = 6).



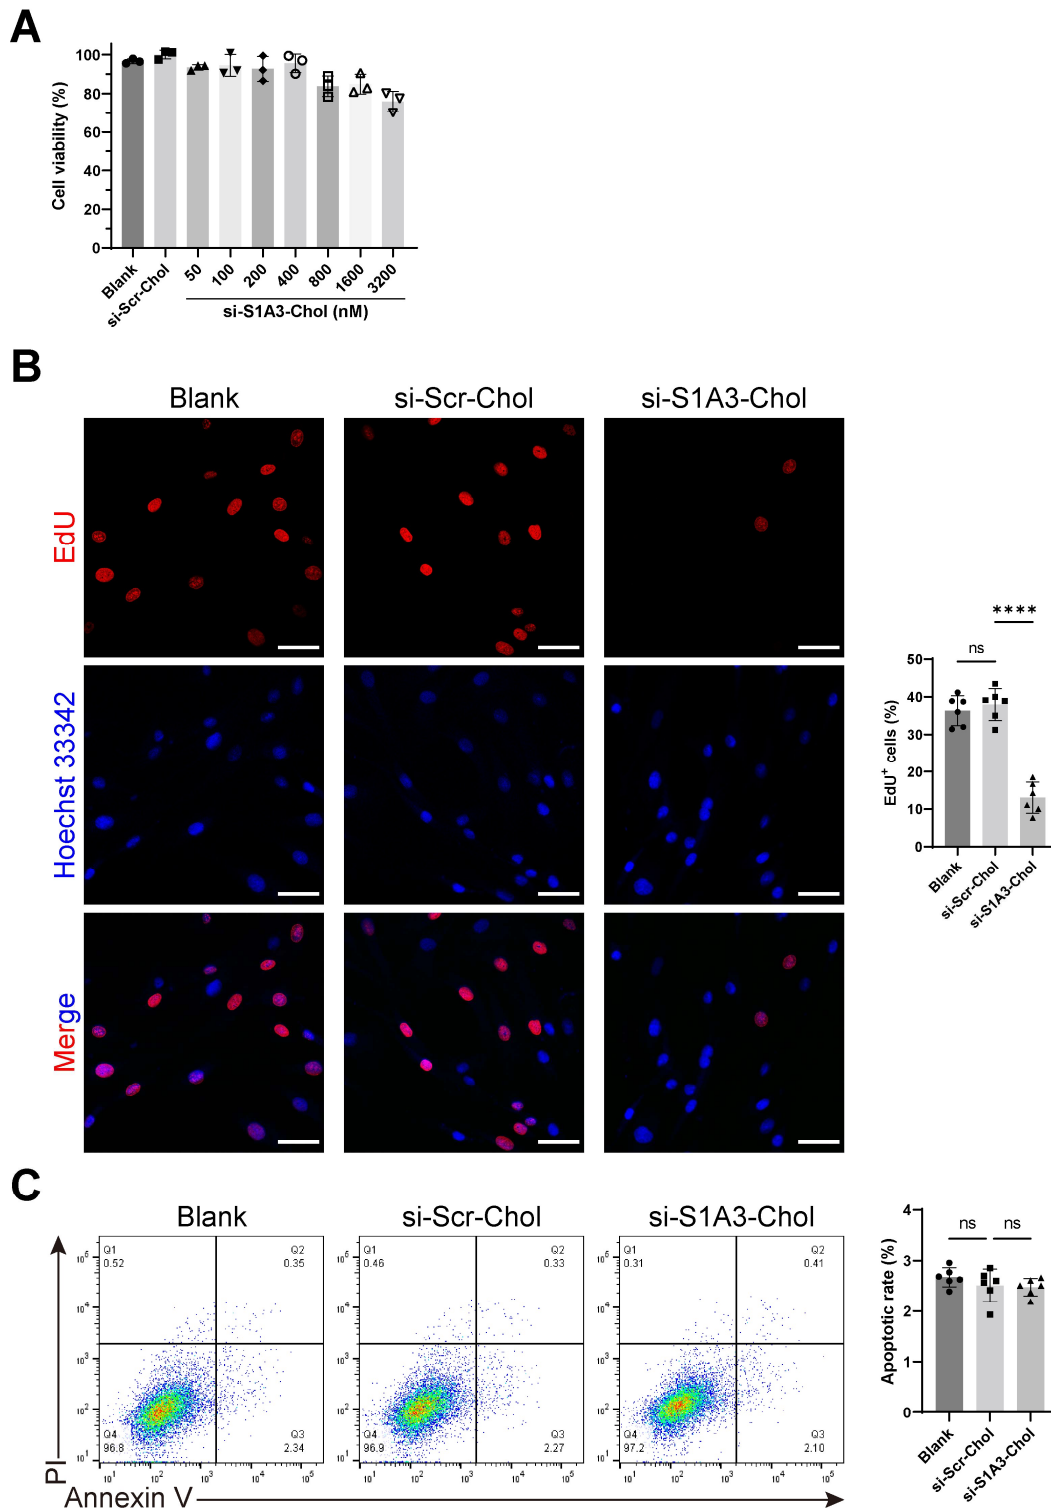

**Figure S9. Cholesterol-conjugated chemically modified siRNA affects RA-FLSs cell proliferation.**

(A) The impact on cell viability was evaluated by CCK-8 assay after RA-FLSs treated with si-Scr-Chol (800 nM) or si-S1A3-Chol at indicated concentration for 48 h, and shown as percentages of si-Scr-Chol (n= 3). (B) The effect of si-S1A3-Chol on cell proliferation was determined by EdU assay. Proliferative RA-FLSs were stained with EdU (red signal). Cell nuclei are stained with Hoechst 33342 (blue signal). The percentages of EdU positive cells were detected by confocal microscope after RA-FLSs treated with si-Scr-Chol or si-S1A3-Chol (800 nM) for 48 h and shown in the bar graph (n = 6). Scale bar, 50  $\mu$ m. (C) The effect of si-S1A3-Chol on cell apoptosis was determined by Annexin V/PI assay. The percentages of Annexin V positive cells were detected by flow cytometry after RA-FLSs treated with si-Scr-Chol or si-S1A3-Chol (800 nM) for 48 h and shown in the bar graph (n = 6). Statistics: Data were presented as mean  $\pm$  SD; ns  $P > 0.05$ , \*\*\*\* $P < 0.0001$  versus si-Scr-Chol group by one-way ANOVA with Dunnett's test for multiple comparisons.

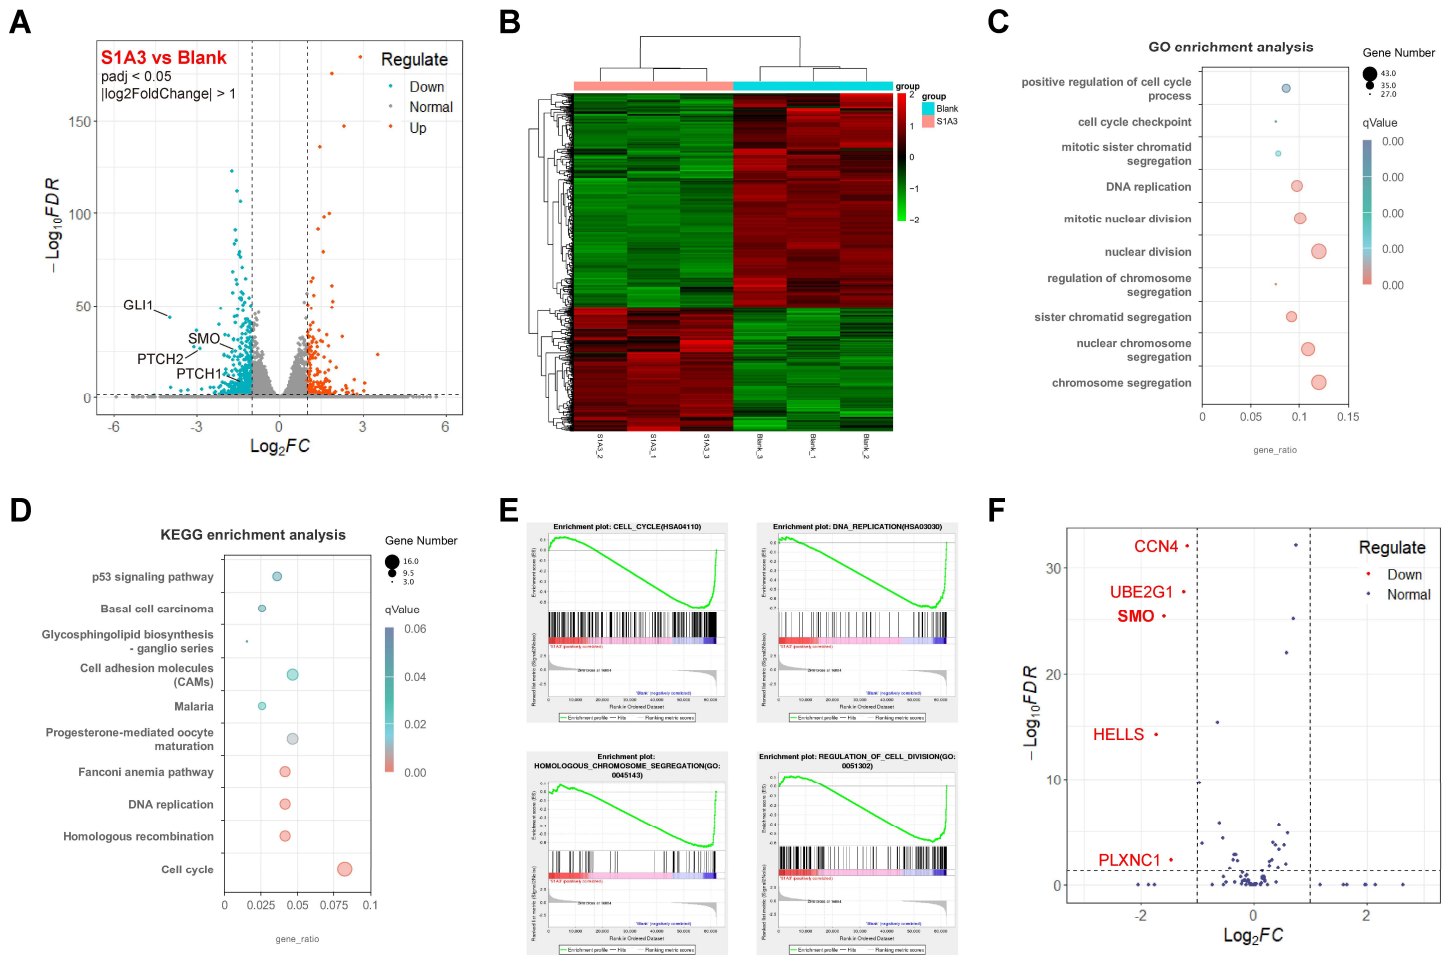

**Figure S10. RNA-seq reveals the mechanisms and off-target effects of si-S1A3-Chol on RA-FLSs.**

(A) Volcano plot and (B) heatmap plot revealed the differential genes expression after RA-FLSs treated with si-S1A3-Chol (800 nM) for 48 h. Genes with an adjusted *P*-value less than 0.05 and absolute fold change of 2 were considered as differentially expressed. (C) GO enrichment analysis, (D) KEGG pathway enrichment analysis, and (E) gene set enrichment analysis were performed to determine the differential genes enrichment and clarify the regulation mechanism of si-S1A3-Chol treatment in RA-FLSs. (F) Volcano plot showed the expression of top 100 similar transcripts in RA-FLSs treating with si-S1A3-Chol (800 nM) for 48 h. The down-regulated genes were label in red.

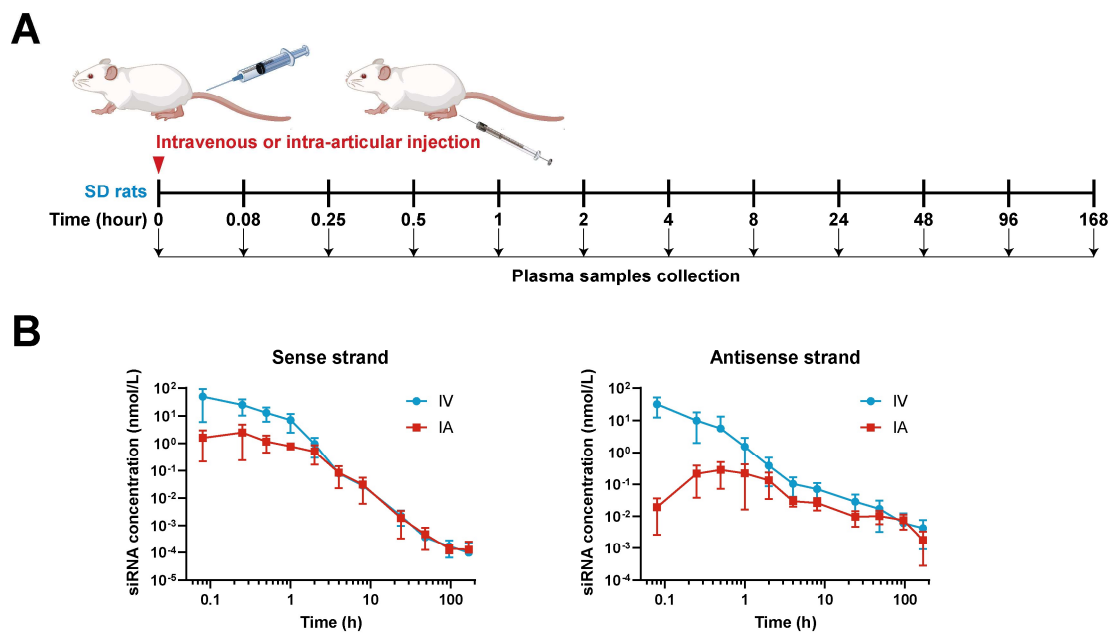

**Figure S11. Intra-articular injection reduces the amount of si-S1A3-Chol in blood circulation.**

(A) The schematic diagram of siRNA pharmacokinetics studies in SD rats. SD rats were injected with single dose si-S1A3-Chol (25 nmol/kg dose of body weight) intravenously or intra-articularly, and the plasma samples were collected at indicated time points. (B) The concentration of sense strand (left) and antisense strand (right) of siRNA in plasma from rats with the si-S1A3-Chol administrated by intravenous injection or intra-articular injection (n = 3).

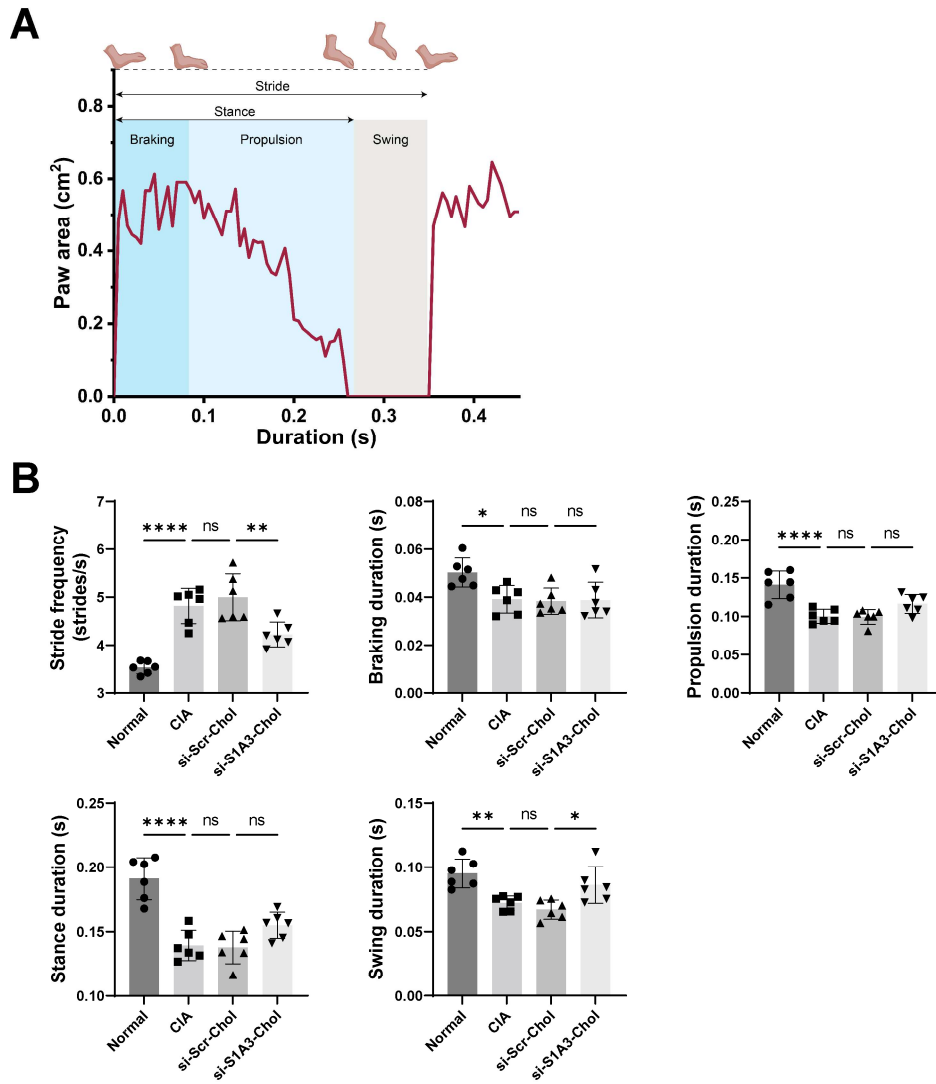

**Figure S12. Cholesterol-conjugated chemically modified siRNA alleviates the gait dysfunction in CIA mice.**

**(A)** The schematic diagram of a complete stride phase in gait analysis. A full stride comprised braking, propulsion, stance and swing phases. **(B)** The effect of si-S1A3-Chol on stride frequency, braking duration, propulsion duration, stance duration, and swing duration of CIA mice were measured in gait analysis ( $n = 6$ ). Statistics: Data were presented as mean  $\pm$  SD; ns  $P > 0.05$ ,  $*P < 0.05$ ,  $**P < 0.01$ ,  $****P < 0.0001$  versus between groups by one-way ANOVA with Dunnett's test for multiple comparisons.

**Movie S1. Cholesterol-conjugated chemically modified siRNA reverses the gait dysfunction in CIA mice.**

The motor function of CIA mice was assessed by gait analysis. Representative ventral images were captured, and the digital footprints were generated. The paw area and stride frequency were increased in CIA mice. si-S1A3-Chol reduced the paw area and stride frequency, showing the effect on reversing gait dysfunction.
